# Supplementary material for: Organic–inorganic hybrid porous sulfonated zinc phosphonate material: efficient catalyst for biodiesel synthesis at room temperature
Source: Royal Society of Chemistry journal article supplement (doi:10.1039/c2gc35225g), 2012-01-01
Supplement: c2gc35225g.pdf [file c2gc35225g.pdf]

# Organic-inorganic hybrid porous sulfonated zinc phosphonate material: efficient catalyst for biodiesel synthesis at room temperature

Malay Pramanik, Mahasweta Nandi, Hiroshi Uyama and Asim Bhaumik\*

## Supporting Information

**Table 1S.** Indexing of orthorhombic structure of HZnP-1.

| <i>h</i> | <i>k</i> | <i>l</i> | 2 theta [°] | d      |
|----------|----------|----------|-------------|--------|
| 1        | 0        | 0        | 8.015       | 10.999 |
| 2        | 0        | 0        | 16.174      | 5.494  |
| 2        | 0        | 1        | 17.445      | 5.130  |
| 0        | 0        | 3        | 18.697      | 4.747  |
| 2        | 1        | 1        | 20.003      | 4.424  |
| 1        | 2        | 0        | 22.010      | 4.060  |
| 3        | 0        | 0        | 24.395      | 3.666  |
| 0        | 1        | 4        | 27.016      | 3.297  |
| 3        | 0        | 2        | 27.459      | 3.266  |
| 3        | 1        | 2        | 29.182      | 3.054  |
| 3        | 0        | 3        | 30.780      | 2.902  |
| 0        | 3        | 1        | 31.289      | 2.853  |
| 1        | 3        | 0        | 31.727      | 2.815  |
| 1        | 3        | 1        | 32.375      | 2.762  |
| 4        | 1        | 1        | 34.618      | 2.579  |
| 2        | 0        | 5        | 35.481      | 2.529  |
| 3        | 1        | 4        | 36.692      | 2.451  |
| 0        | 2        | 5        | 37.510      | 2.386  |
| 0        | 0        | 6        | 37.808      | 2.373  |
| 4        | 2        | 0        | 38.673      | 2.327  |
| 4        | 1        | 3        | 39.241      | 2.296  |
| 2        | 2        | 5        | 41.164      | 2.189  |
| 1        | 4        | 0        | 42.214      | 2.142  |
| 1        | 4        | 1        | 42.691      | 2.119  |
| 2        | 4        | 0        | 44.616      | 2.030  |
| 4        | 3        | 1        | 45.778      | 1.980  |
| 2        | 0        | 7        | 47.667      | 1.908  |
| 6        | 0        | 0        | 49.651      | 1.833  |

### Unit cell parameters

| Parameters                  | Deviations  |
|-----------------------------|-------------|
| $a = 11.00153$              | 0.00955     |
| $b = 8.74173$               | 0.00740     |
| $c = 14.62239$              | 0.01371     |
| $V = 1371.48 \text{ \AA}^3$ | ESD = 2.122 |

**Table 2S.** Indexing of orthorhombic structure of HZnPS-1.

| <i>h</i> | <i>k</i> | <i>l</i> | 2 theta [°] | d     |
|----------|----------|----------|-------------|-------|
| 1        | 1        | 0        | 10.600      | 8.358 |
| 0        | 0        | 2        | 11.660      | 7.653 |
| 1        | 2        | 0        | 15.566      | 5.705 |
| 1        | 2        | 1        | 16.304      | 5.346 |
| 0        | 1        | 3        | 18.581      | 4.774 |
| 2        | 1        | 1        | 18.895      | 4.708 |
| 1        | 3        | 0        | 21.394      | 4.150 |
| 2        | 2        | 1        | 22.078      | 4.032 |
| 1        | 3        | 1        | 22.370      | 4.005 |
| 0        | 3        | 2        | 22.846      | 3.884 |
| 1        | 2        | 3        | 23.379      | 3.803 |
| 2        | 2        | 2        | 24.286      | 3.668 |
| 3        | 0        | 1        | 25.719      | 3.453 |
| 0        | 4        | 0        | 26.385      | 3.380 |
| 2        | 3        | 1        | 26.563      | 3.354 |
| 0        | 4        | 1        | 26.916      | 3.301 |
| 0        | 0        | 5        | 29.190      | 3.061 |
| 0        | 1        | 5        | 29.983      | 2.986 |
| 3        | 3        | 1        | 32.687      | 2.741 |
| 2        | 3        | 4        | 35.006      | 2.557 |
| 4        | 0        | 2        | 35.600      | 2.511 |
| 2        | 5        | 0        | 37.367      | 2.410 |
| 4        | 0        | 3        | 37.967      | 2.358 |
| 4        | 2        | 2        | 38.403      | 2.354 |
| 0        | 0        | 7        | 41.214      | 2.187 |
| 1        | 0        | 7        | 42.222      | 2.142 |
| 1        | 1        | 7        | 42.840      | 2.116 |
| 2        | 6        | 1        | 44.037      | 2.056 |
| 0        | 3        | 7        | 46.124      | 1.967 |
| 2        | 4        | 6        | 47.782      | 1.902 |

### Unit cell parameters

| Parameters          | Deviations  |
|---------------------|-------------|
| <i>a</i> = 10.64963 | 0.01560     |
| <i>b</i> = 13.51797 | 0.01882     |
| <i>c</i> = 15.30462 | 0.01518     |
| V = 2203.273        | ESD = 4.960 |

**Calculation of acid strength of HZnPS-1:** 100 mg sulphonated material (HZnPS-1) was stirred in 50 ml water for 8 h at 313 K. After cooling at room temperature, 10 ml sodium hydroxide solution with strength 0.03125 (N) was added to 10 ml aqueous mixture of HZnPS-1 and stirred overnight. Then after filtration, the excess NaOH solution was titrated with 0.1 (N) oxalic acid solutions. 2.2 ml oxalic acid was required to reach the neutral point.

$$V_{\text{NaOH}} \times S_{\text{NaOH}} \equiv V_{\text{OX}} \times S_{\text{OX}}$$

$$V_{\text{NaOH}} \times 0.03125 \equiv 2.2 \times 0.1$$

$$V_{\text{NaOH}} = 7.02 \text{ ml}$$

So the NaOH required to neutralized the acidic site of the HZnPS-1 = (10-7.02) ml = 2.96 ml.

$$V_{\text{NaOH}} \times S_{\text{NaOH}} \equiv V_{\text{HZnPS-1}} \times S_{\text{HZnPS-1}}$$

$$2.96 \times 0.03125 \equiv 10 \times S_{\text{HZnPS-1}}$$

$$S_{\text{HZnPS-1}} = 0.0093 \text{ (N)}$$

The equivalent weight of sulphonic acid group (-SO<sub>3</sub>H) is 81.

So, 50 ml 0.0093 (N) HZnPS-1 mixture solution contains 0.0379 gm free sulphonic acid side.

Calculation: 1000 ml 1 (N) HZnPS-1  $\equiv$  81 gm free sulphonic acid in the solid matrix (HZnPS-1)

$$50 \text{ ml } 0.0093 \text{ (N) HZnPS-1} \equiv 0.0379 \text{ gm free sulphonic acid.}$$

$$= 0.467 \text{ mmol free sulphonic acid.}$$

100 mg sample (HZnPS-1) contains 0.467 mmol free sulphonic acid.

1000 mg sample (HZnPS-1) contains 4.67 mmol free sulphonic acid.

### $^1\text{H}$ NMR of Entry 1

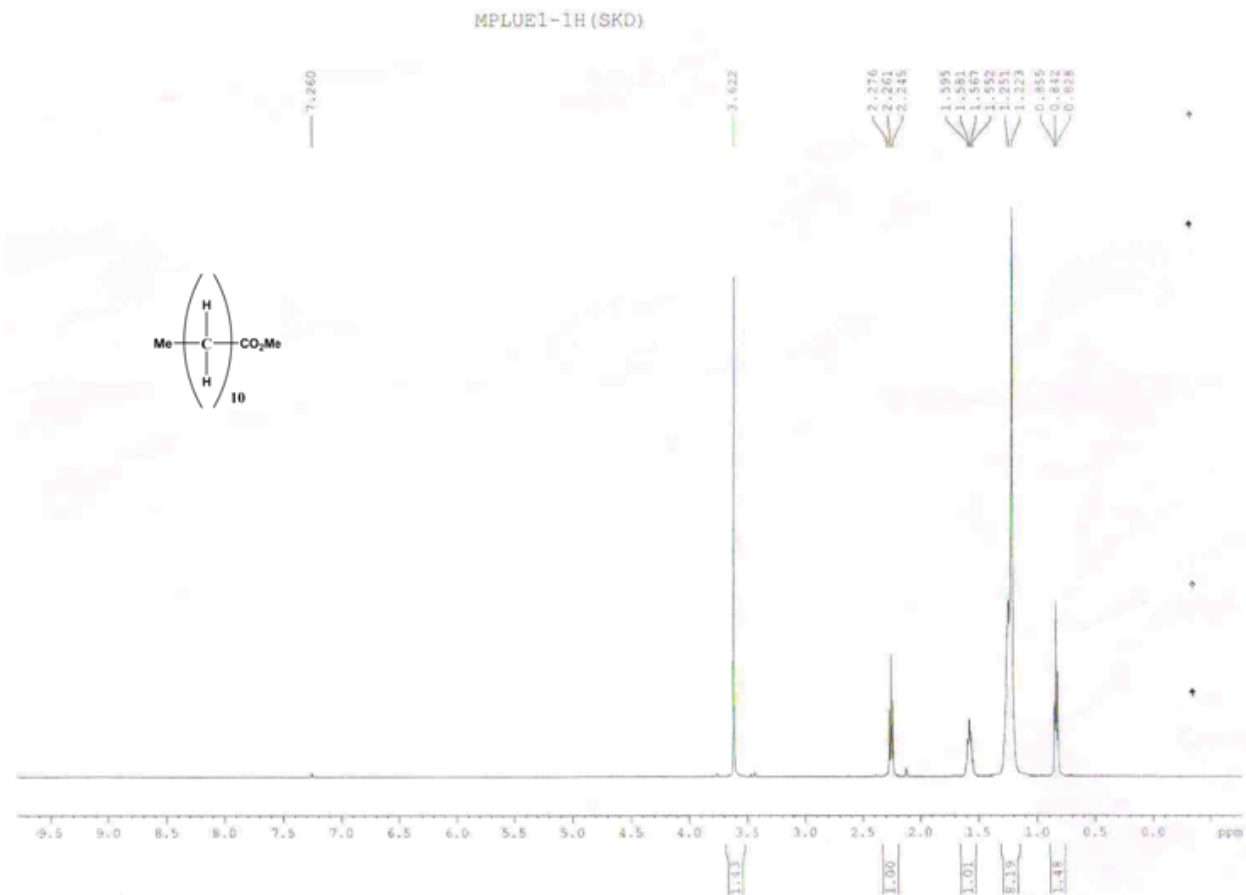

### <sup>13</sup>C NMR of Entry 1

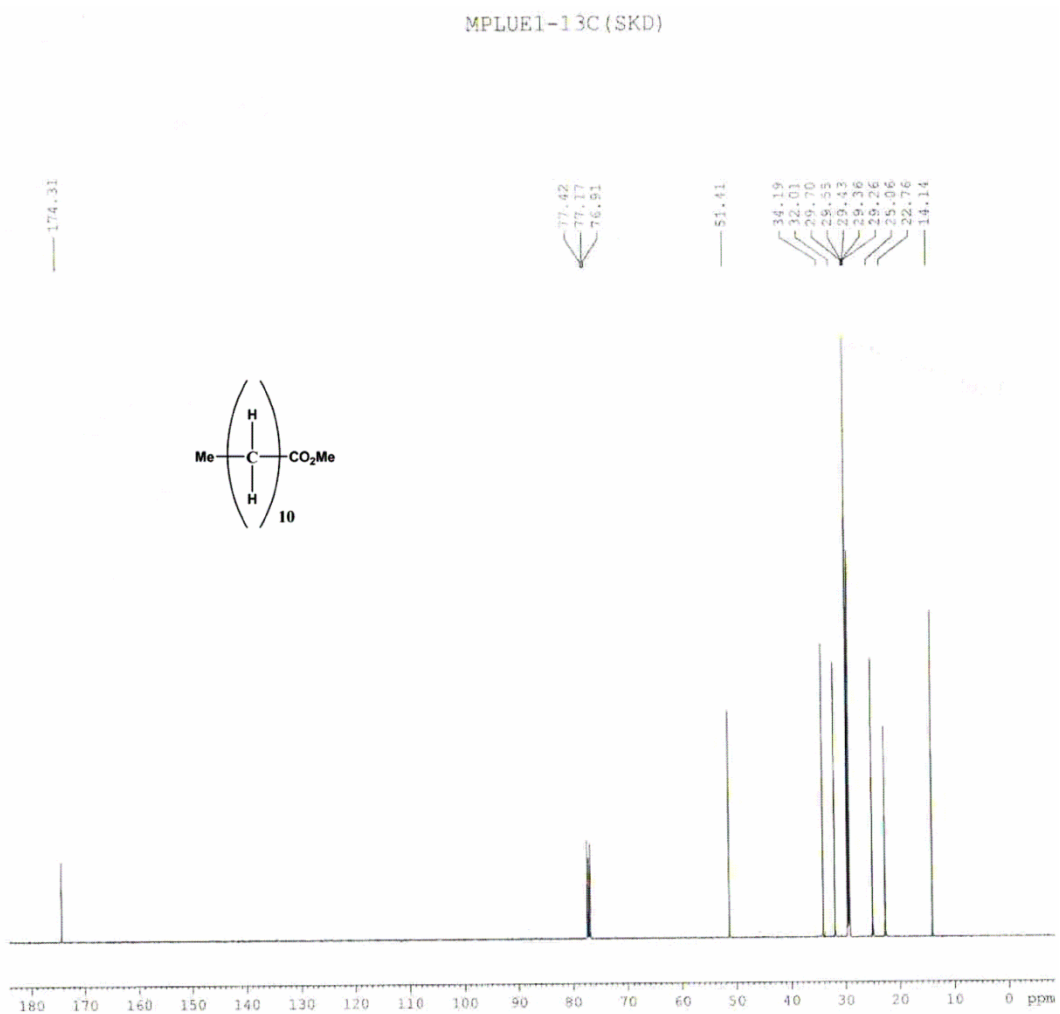

### $^1\text{H}$ NMR of Entry 2

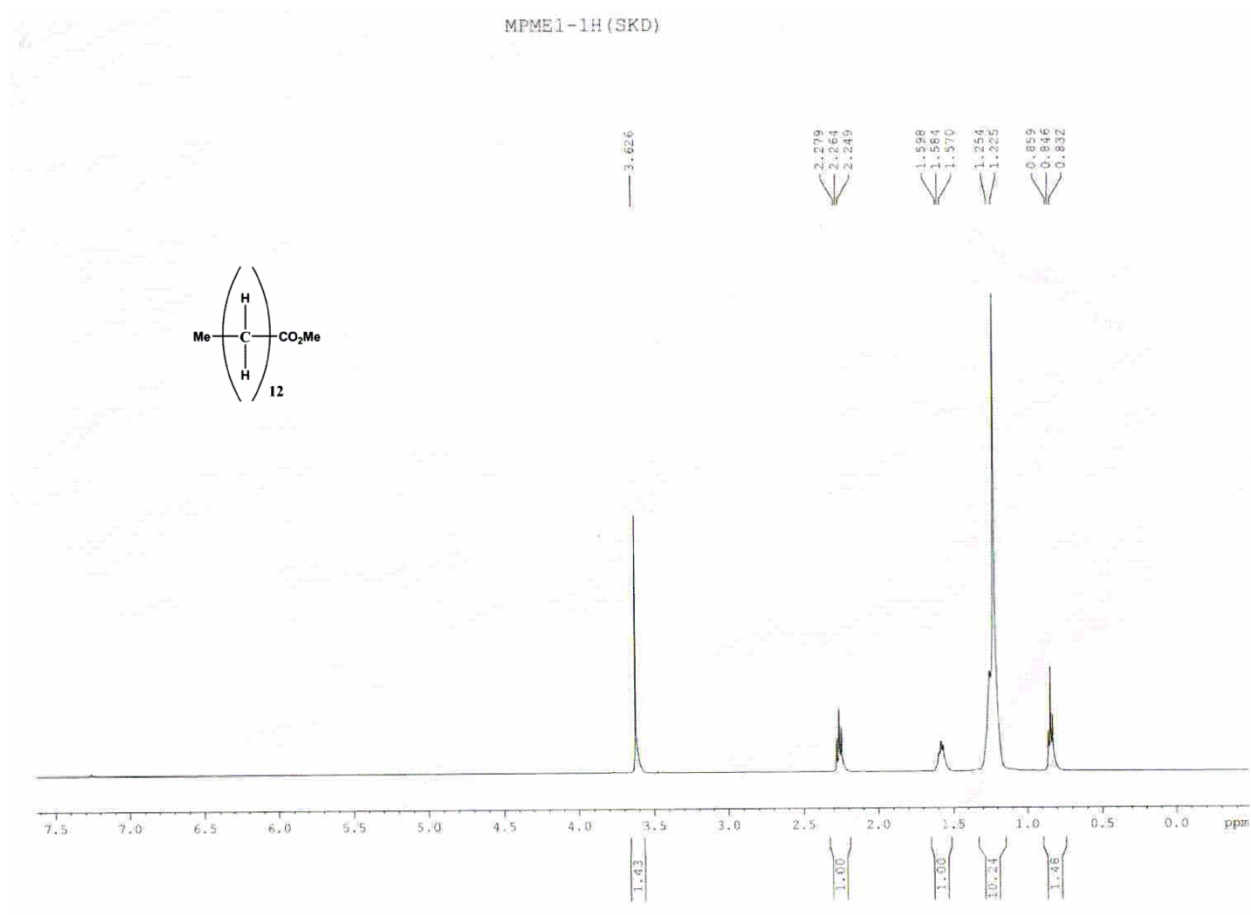

### <sup>13</sup>C NMR of Entry 2

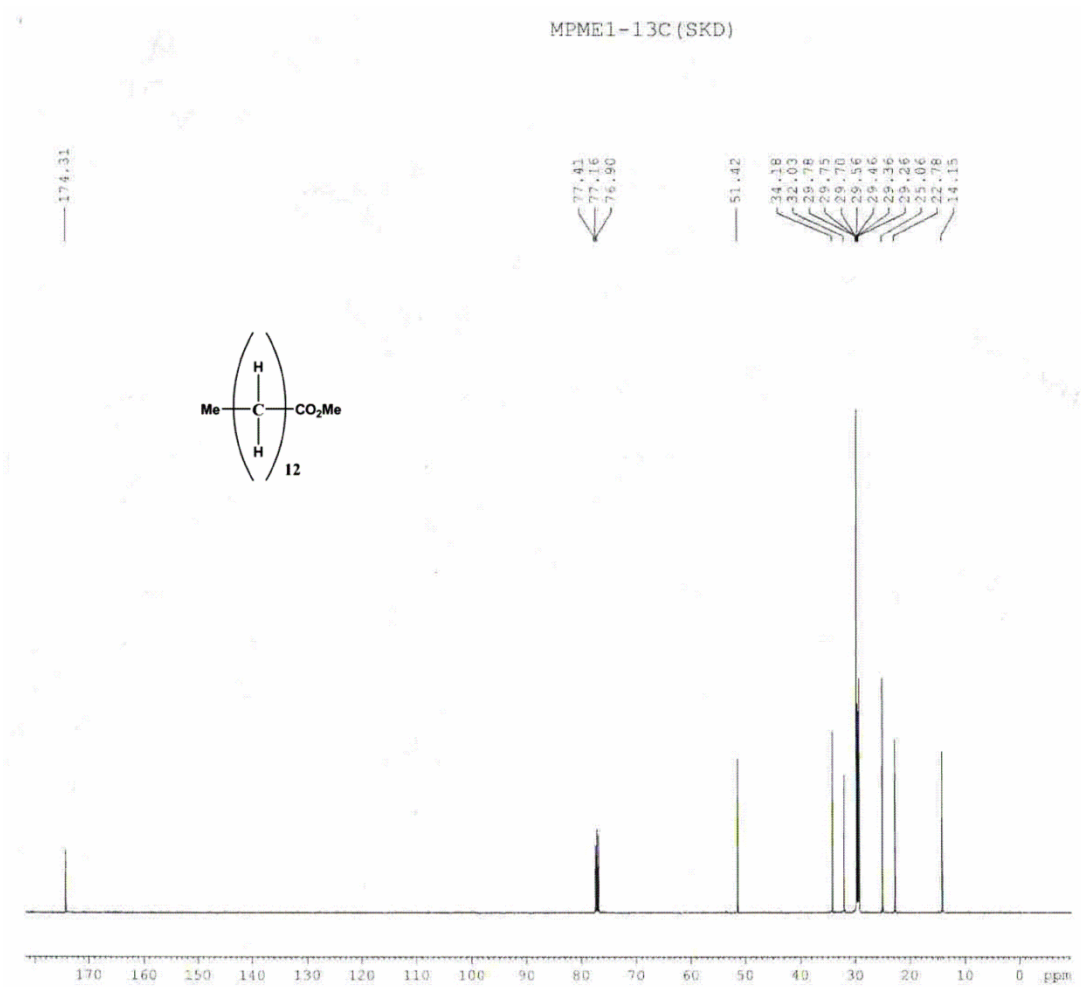



### <sup>1</sup>H NMR of Entry 3

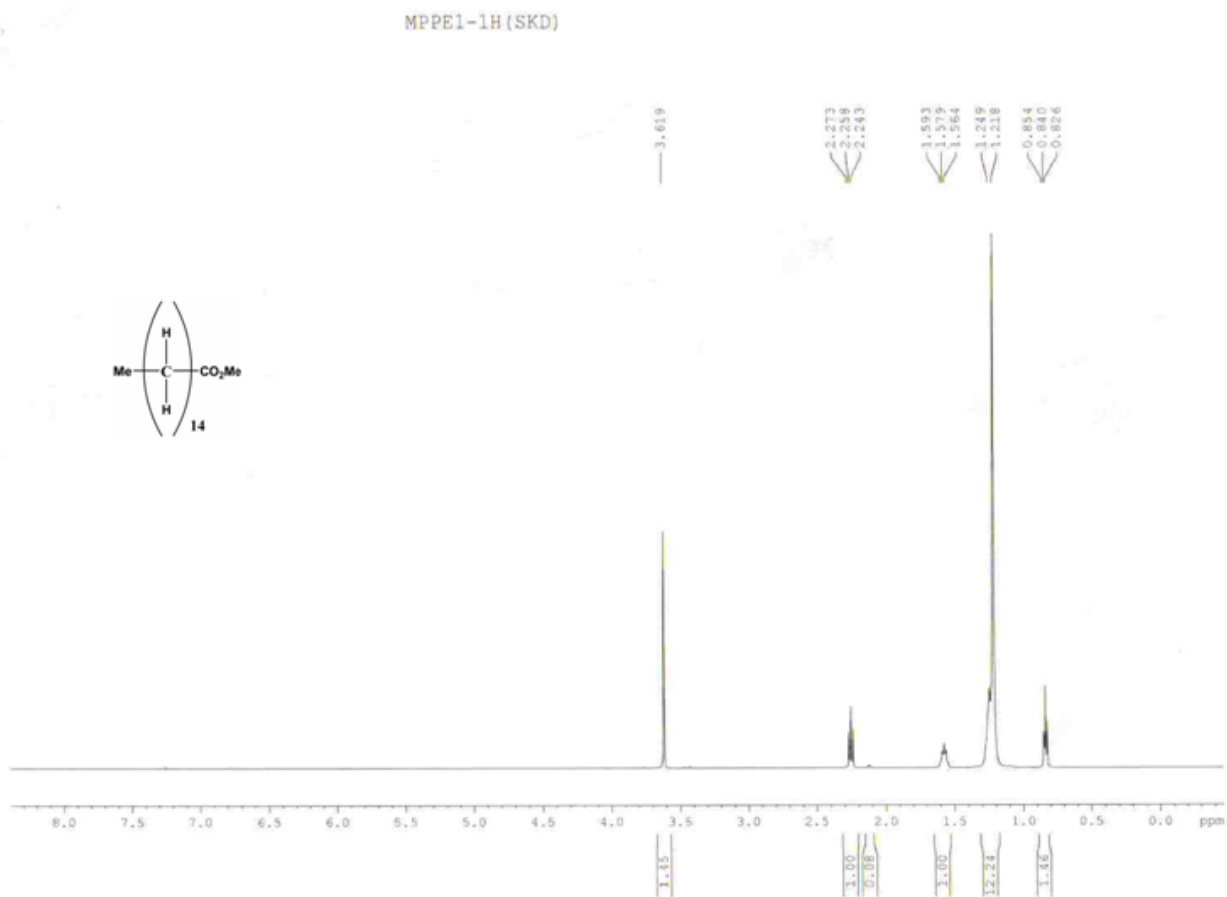

### $^{13}\text{C}$ NMR of Entry 3

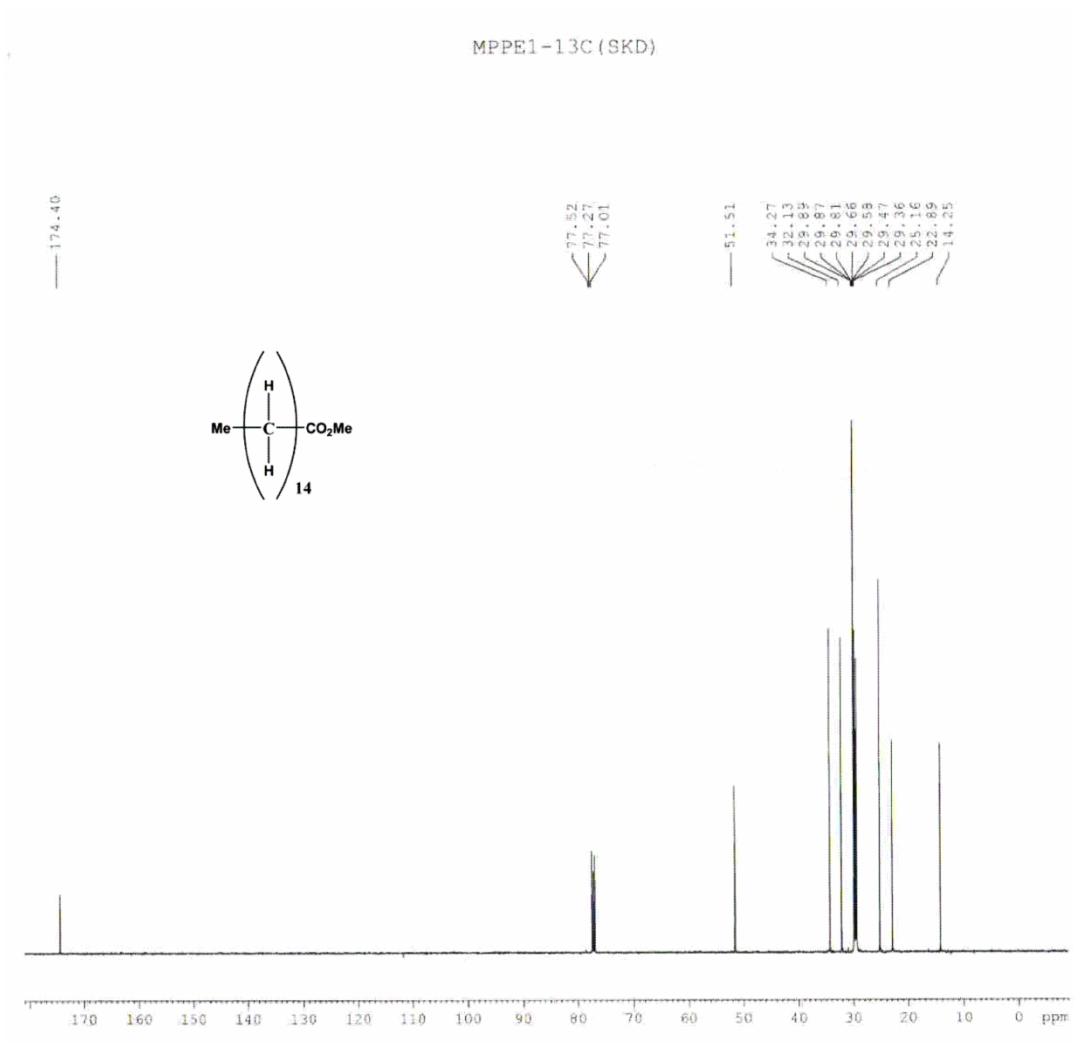

### <sup>1</sup>H NMR of Entry 4

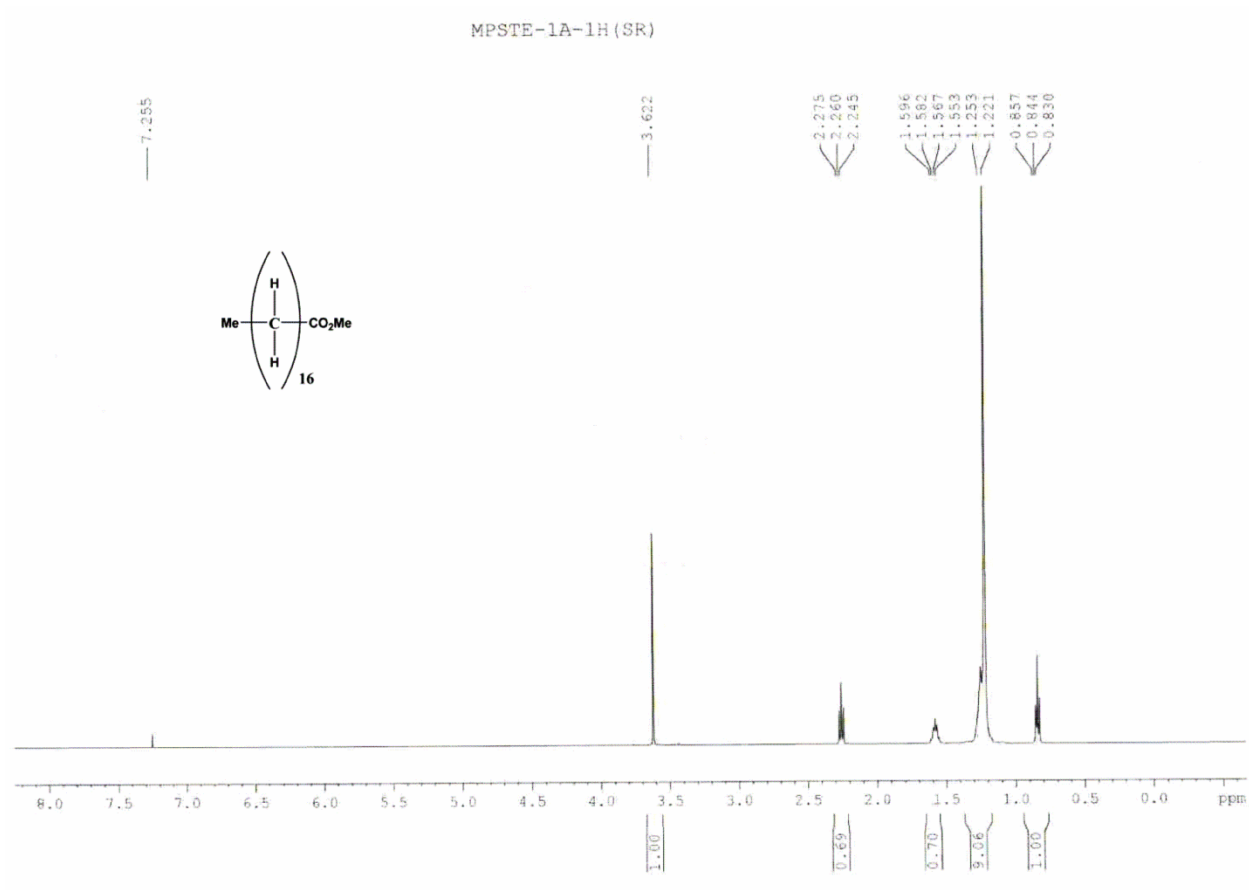

### $^{13}\text{C}$ NMR of Entry 4

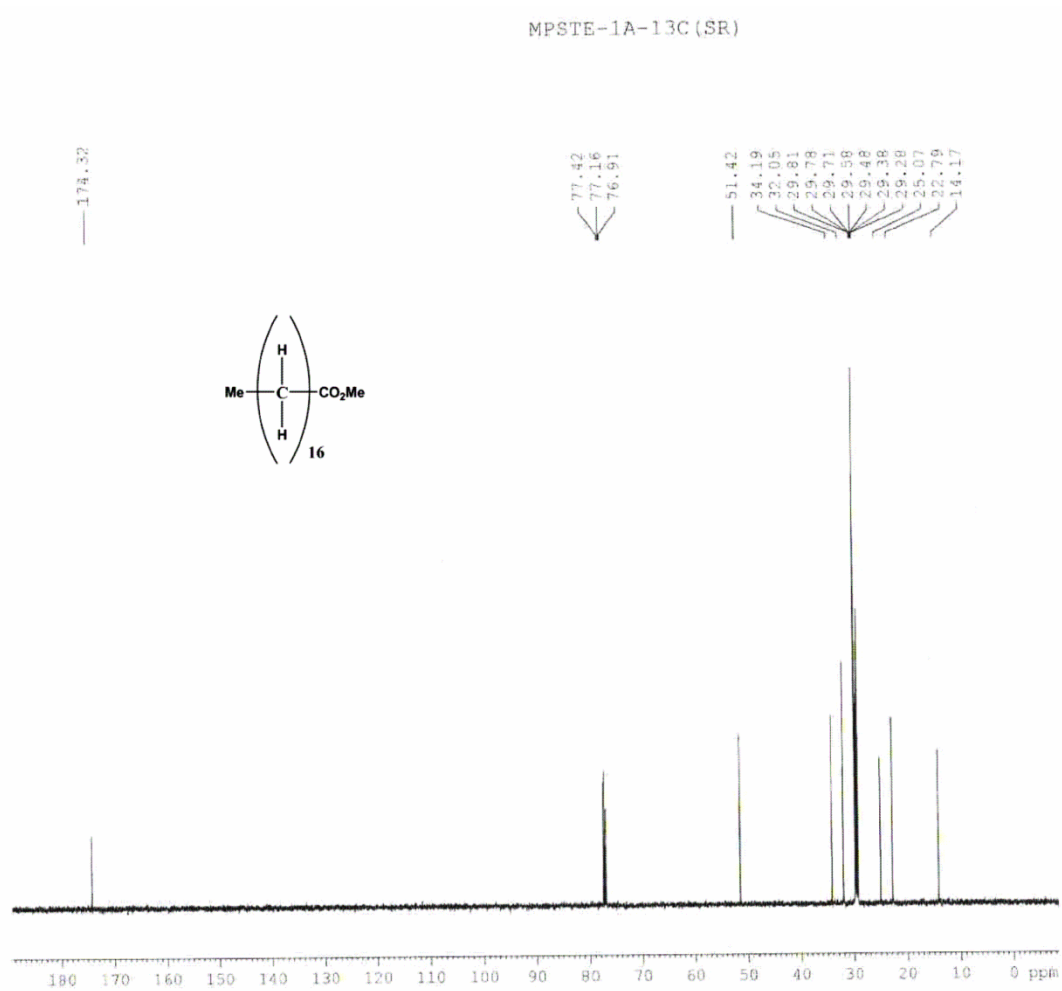

### $^1\text{H}$ NMR of Entry 5

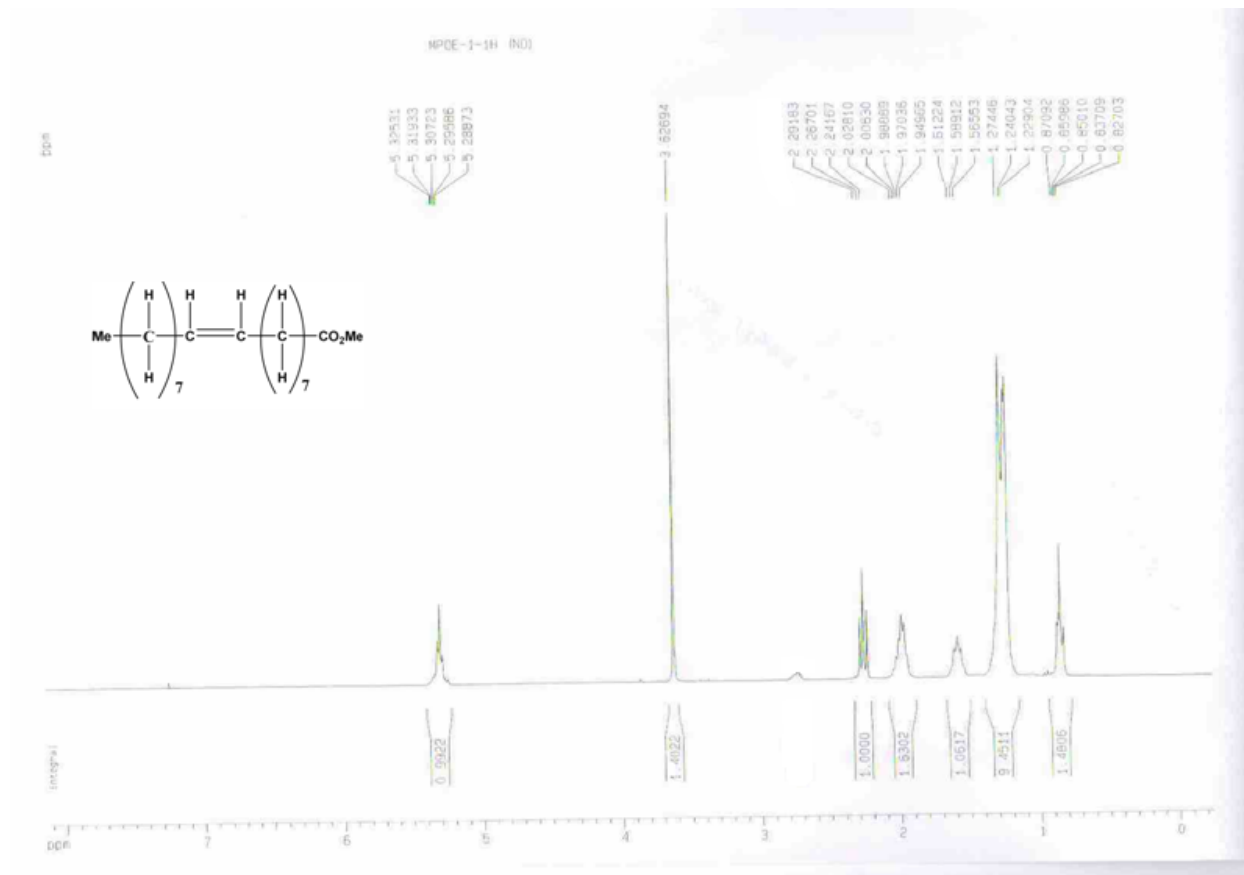

### $^{13}\text{C}$ NMR of Entry 5

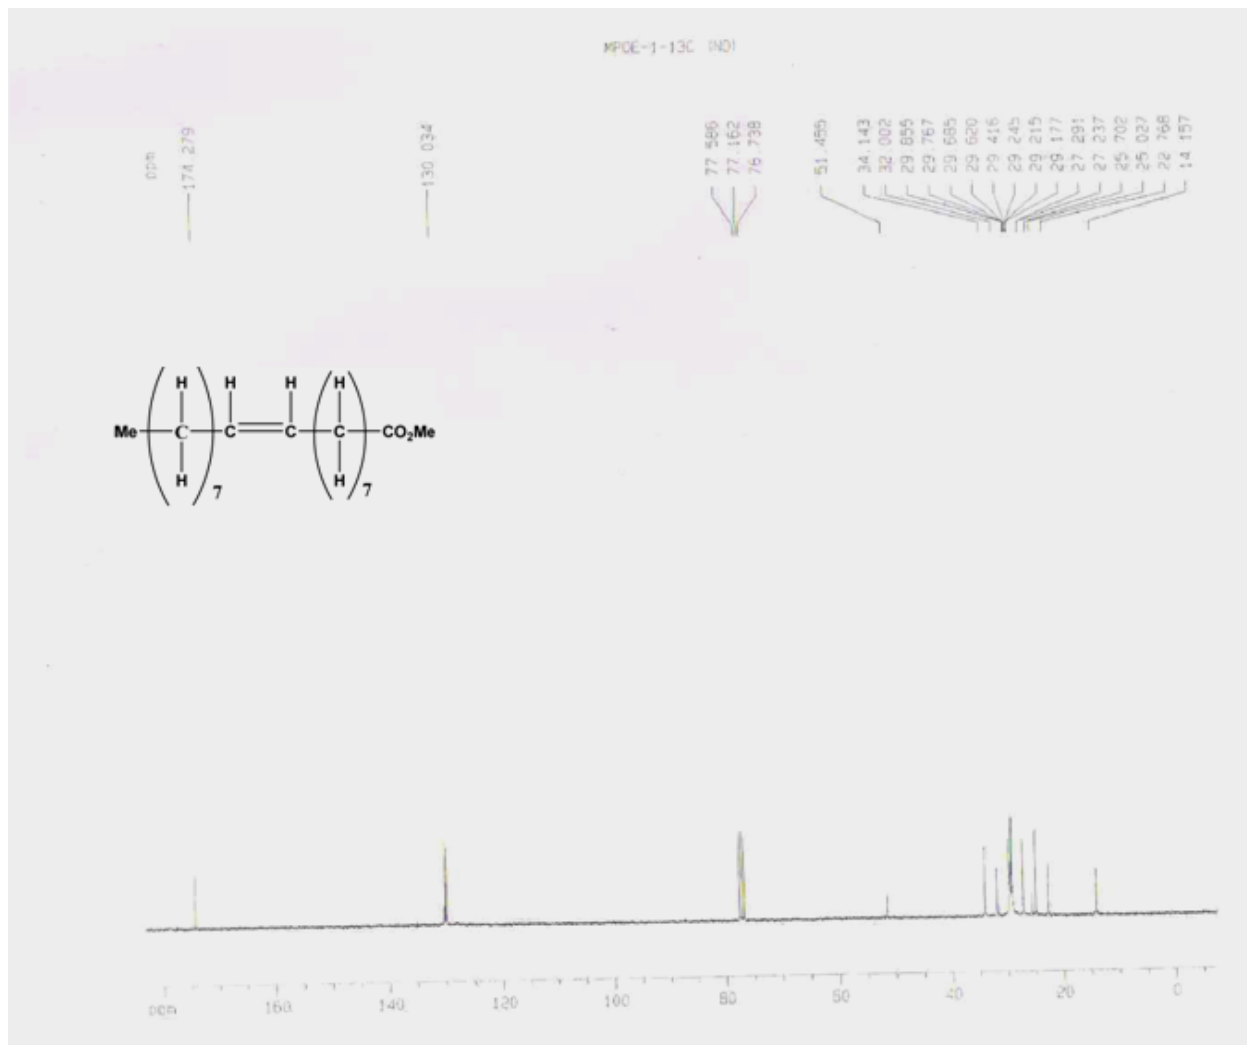

### $^1\text{H}$ NMR of Entry 6

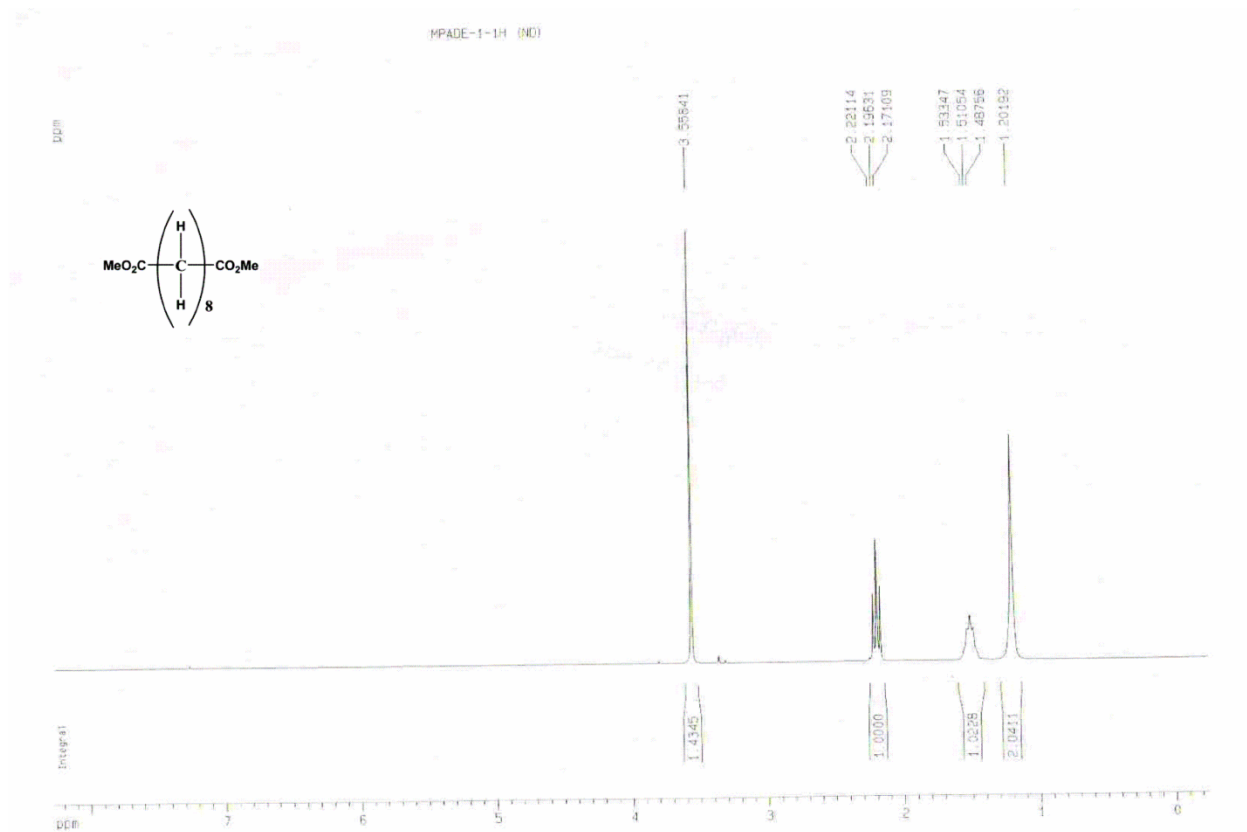

### $^{13}\text{C}$ NMR of Entry 6

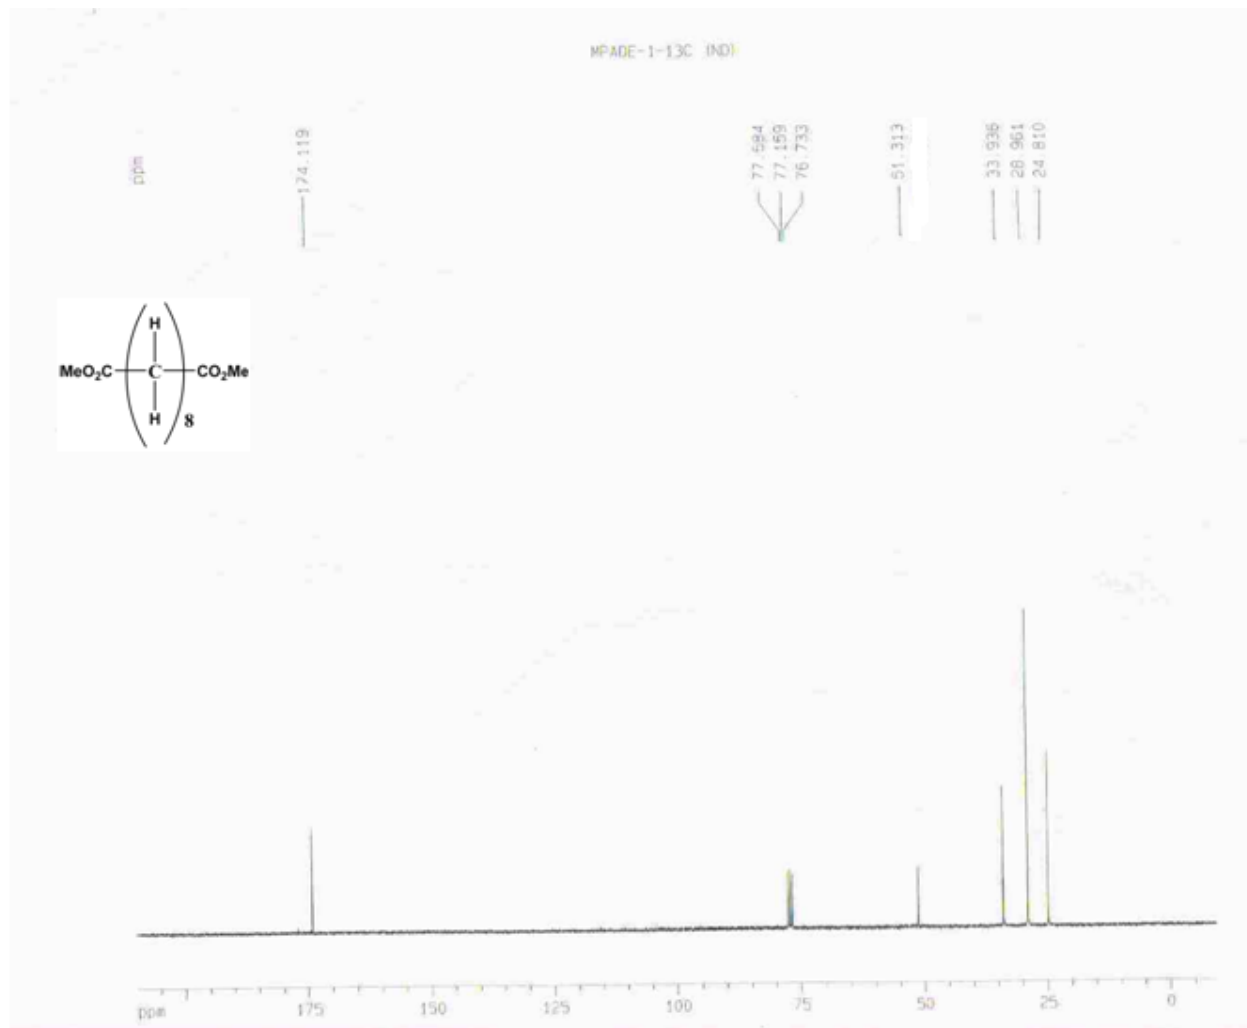



### $^1\text{H}$ NMR of Entry 7

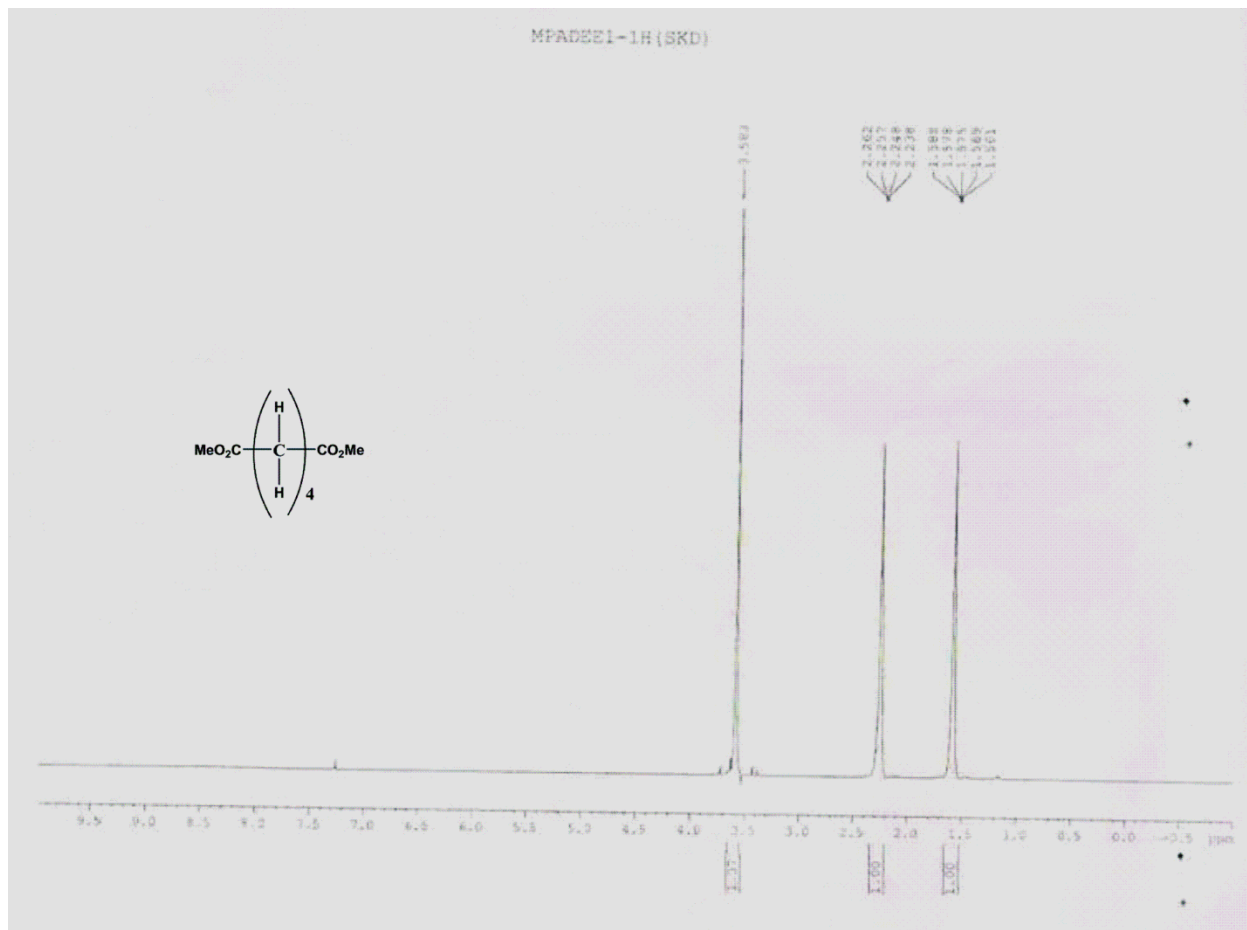

### $^{13}\text{C}$ NMR of Entry 7

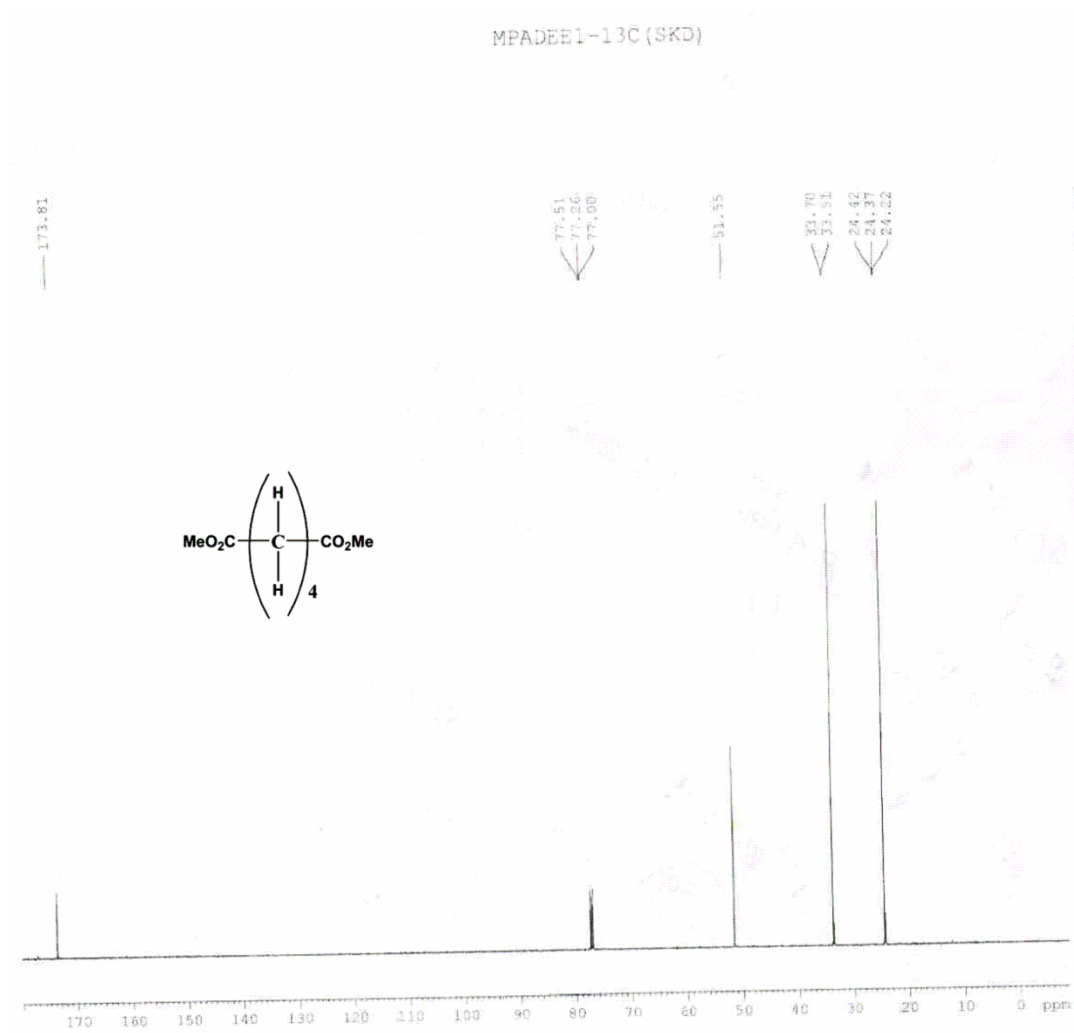

### GC Analysis of Table 3 reaction mixtures

|                     |                                    |
|---------------------|------------------------------------|
| Sample name:        | TE-ECNA- blank                     |
| Sample note:        | TE-ECNA- blank                     |
| Submission time:    | Friday, April 20, 2012 11:23:27 AM |
| Injection date:     | Friday, April 20, 2012 12:05:31 PM |
| GC Description:     | Gas Chromatograph                  |
| Signal description: | OOS1 A, B                          |
| Method:             | 75-1-7-270-2                       |

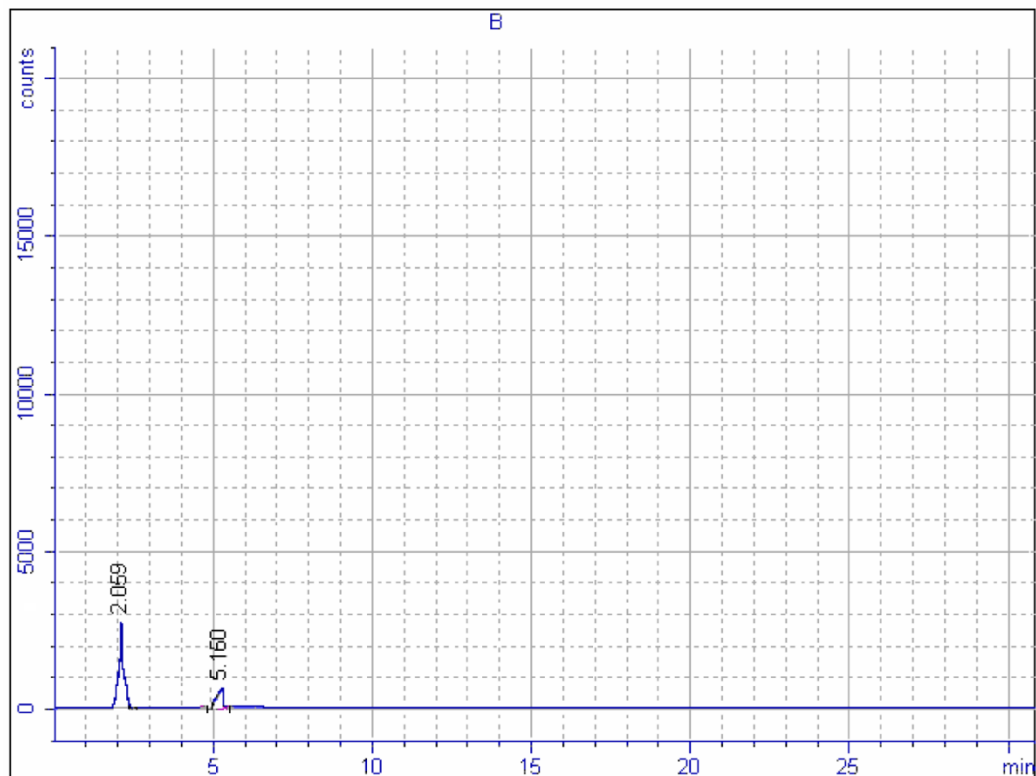

| Calibration last saved: |                      |                    |             |                 |          |
|-------------------------|----------------------|--------------------|-------------|-----------------|----------|
| Multiplier:             |                      | 1.0000             |             |                 |          |
| Dilution:               |                      | 1.0000             |             |                 |          |
| Sample amount:          |                      | 0.0000 Microlitres |             |                 |          |
| Sample type:            |                      | Sample             |             |                 |          |
| Sampling source:        |                      | Manual             |             |                 |          |
| Signal                  | Retention Time [min] | Type               | Width [min] | Area [counts*s] | Area %   |
| 1                       | 2.059                | BV                 | 0.047       | 11251.69996     | 78.23320 |
| 1                       | 5.160                | PB                 | 0.133       | 3130.87761      | 21.76311 |

|                     |                                    |
|---------------------|------------------------------------|
| Sample name:        | TE-ECA- HZnPS-1                    |
| Sample note:        | TE-ECA- HZnPS-1                    |
| Submission time:    | Friday, April 20, 2012 11:23:27 AM |
| Injection date:     | Friday, April 20, 2012 12:53:21 PM |
| GC Description:     | Gas Chromatograph                  |
| Signal description: | OOS1 A, B                          |
| Method:             | 75-1-7-270-2                       |

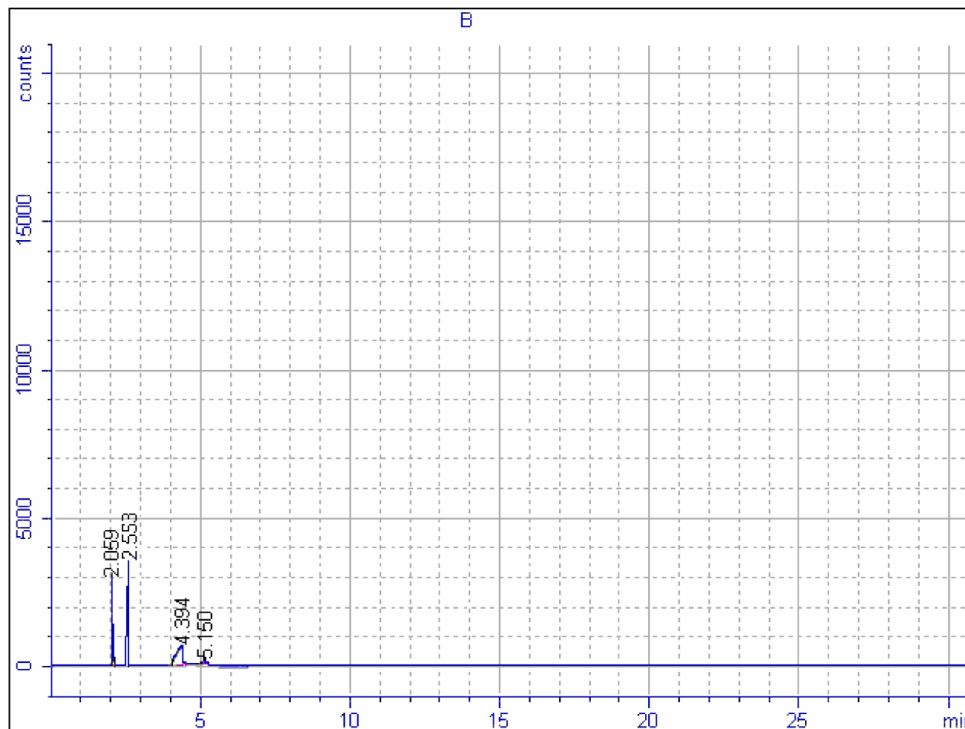

|                         |                    |
|-------------------------|--------------------|
| Calibration last saved: |                    |
| Multiplier:             | 1.0000             |
| Dilution:               | 1.0000             |
| Sample amount:          | 0.0000 Microlitres |
| Sample type:            | Sample             |
| Sampling source:        | Manual             |

| Signal | Retention Time [min] | Type | Width [min] | Area [counts*s] | Area %   |
|--------|----------------------|------|-------------|-----------------|----------|
| 1      | 2.059                | PV   | 0.038       | 1746.75420      | 12.19689 |
| 1      | 2.533                | VB   | 0.054       | 4216.27250      | 29.4320  |
| 1      | 4.394                | PB   | 0.175       | 6796.96231      | 47.44555 |
| 1      | 5.150                | PV   | 0.133       | 1541.87761      | 10.76311 |

|                            |                                    |
|----------------------------|------------------------------------|
| <b>Instrument run log:</b> | TE- ECA- blank                     |
| Sample name:               | TE- ECA- blank                     |
| Sample note:               | TE -ECA- blank                     |
| Submission time:           | Tuesday, April 17, 2012 1:30:27 PM |
| Injection date:            | Tuesday, April 17, 2012 2:45:01 PM |
| GC Description:            | Gas Chromatograph - SN: @COM1:     |
| Signal description:        | OOS1 A, B                          |
| Method:                    | 80-2-5-200                         |

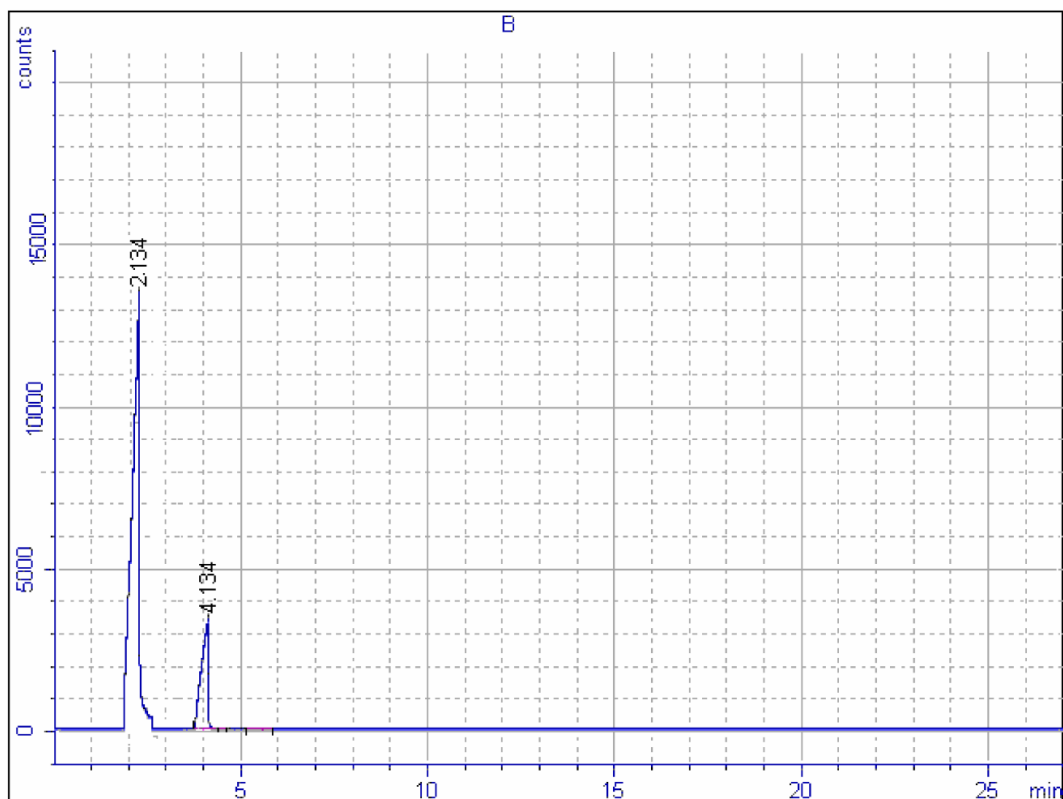

|                         |                             |             |                    |                        |               |
|-------------------------|-----------------------------|-------------|--------------------|------------------------|---------------|
| Calibration last saved: |                             |             |                    |                        |               |
| Multiplier:             | 1.0000                      |             |                    |                        |               |
| Dilution:               | 1.0000                      |             |                    |                        |               |
| Sample amount:          | 0.0000 Microlitres          |             |                    |                        |               |
| Sample type:            | Sample                      |             |                    |                        |               |
| Sampling source:        | Manual                      |             |                    |                        |               |
| <b>Signal</b>           | <b>Retention Time [min]</b> | <b>Type</b> | <b>Width [min]</b> | <b>Area [counts*s]</b> | <b>Area %</b> |
| 1                       | 2.458                       | BP          | 0.206              | 37982.10640            | 81.6735       |
| 1                       | 4.134                       | PV          | 0.150              | 8440.46801             | 18.3245       |

|                     |                                    |
|---------------------|------------------------------------|
| Sample name:        | TE-ECA- HZnPS-1                    |
| Sample note:        | TE-ECA- HZnPS-1                    |
| Submission time:    | Tuesday, April 17, 2012 1:30:46 PM |
| Injection date:     | Tuesday, April 17, 2012 3:16:10 PM |
| GC Description:     | Gas Chromatograph - SN: @COM1:     |
| Signal description: | OOS1 A, B                          |
| Method:             | 80-2-5-200                         |

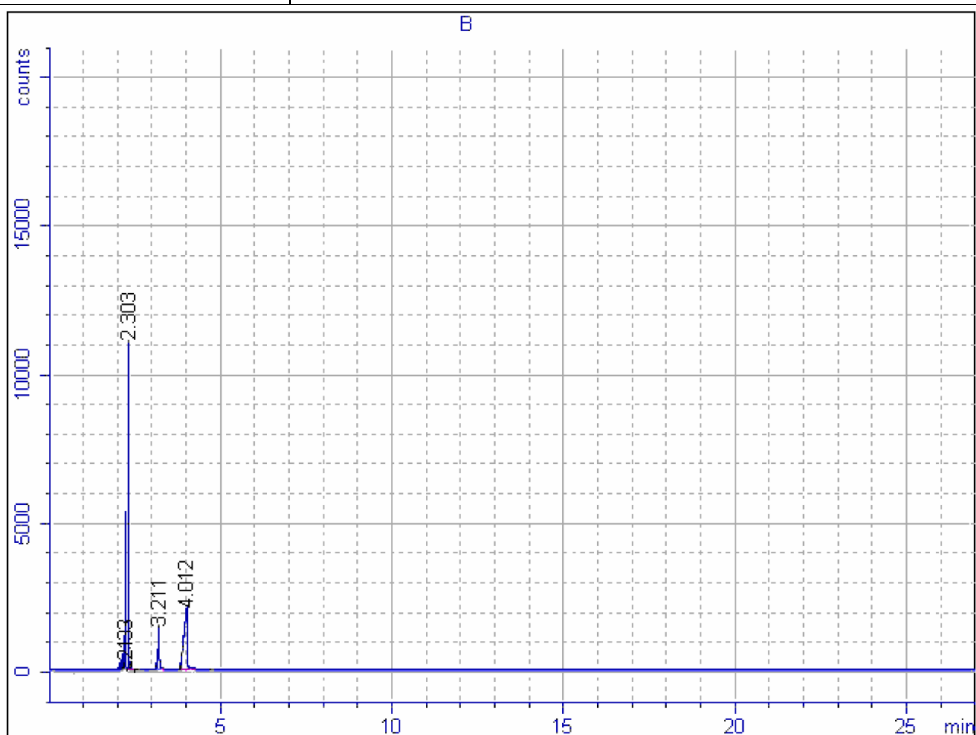

|                         |                    |
|-------------------------|--------------------|
| Calibration last saved: |                    |
| Multiplier:             | 1.0000             |
| Dilution:               | 1.0000             |
| Sample amount:          | 0.0000 Microlitres |
| Sample type:            | Sample             |
| Sampling source:        | Manual             |

| Signal | Retention Time [min] | Type | Width [min] | Area [counts*s] | Area %   |
|--------|----------------------|------|-------------|-----------------|----------|
| 1      | 2.133                | PV   | 0.038       | 6120.75420      | 37.27689 |
| 1      | 2.303                | VB   | 0.014       | 10778.27250     | 17.25800 |
| 1      | 3.211                | PB   | 0.047       | 3826.21132      | 18.75882 |
| 1      | 4.012                | PV   | 0.081       | 7366.31637      | 26.73700 |

|                            |                                    |
|----------------------------|------------------------------------|
| <b>Instrument run log:</b> | TE- EA- blank                      |
| Sample name:               | TE- EA- blank                      |
| Sample note:               | TE -EA- blank                      |
| Submission time:           | Friday, April 20, 2012 11:23:27 AM |
| Injection date:            | Friday, April 20, 2012 01:23:27 PM |
| GC Description:            | Gas Chromatograph - SN: @COM1:     |
| Signal description:        | OOS1 A, B                          |
| Method:                    | 75-1-7-270-2                       |

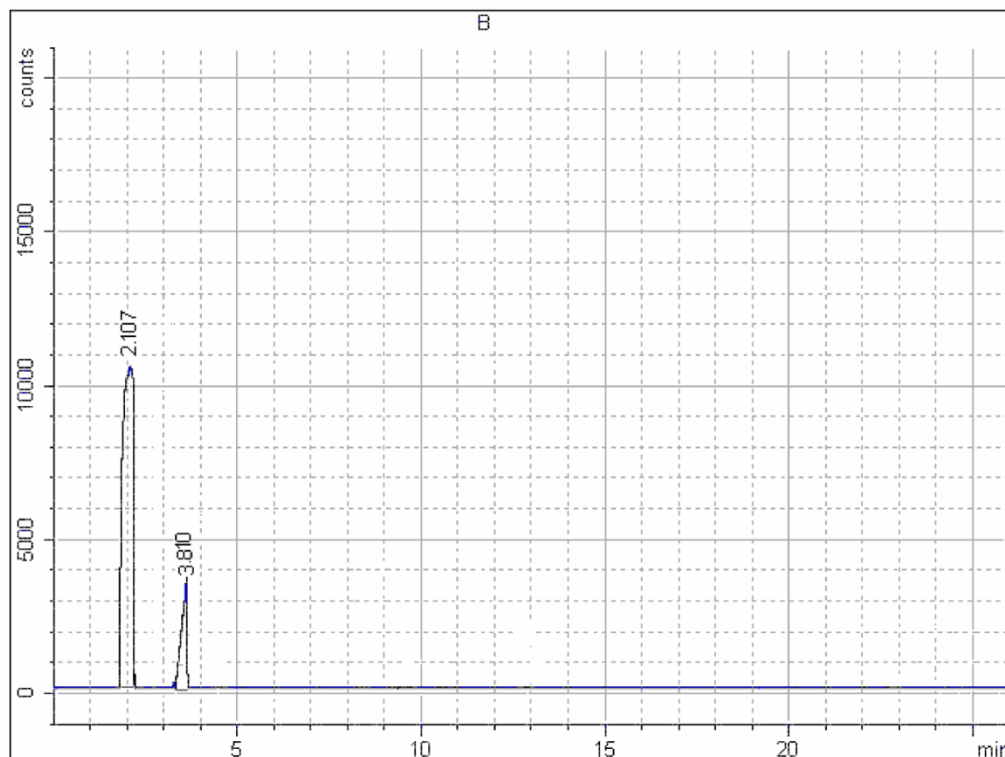

|                         |                    |
|-------------------------|--------------------|
| Calibration last saved: |                    |
| Multiplier:             | 1.0000             |
| Dilution:               | 1.0000             |
| Sample amount:          | 0.0000 Microlitres |
| Sample type:            | Sample             |
| Sampling source:        | Manual             |

| Signal | Retention Time [min] | Type | Width [min] | Area [counts*s] | Area %   |
|--------|----------------------|------|-------------|-----------------|----------|
| 1      | 2.107                | BV   | 0.230       | 10962.69996     | 76.23320 |
| 1      | 3.810                | PB   | 0.133       | 3418.87761      | 23.76311 |

|                            |                                     |
|----------------------------|-------------------------------------|
| <b>Instrument run log:</b> | TE- EA- HZnPS-1                     |
| Sample name:               | TE- EA- HZnPS-1                     |
| Sample note:               | TE -EA- HZnPS-1                     |
| Submission time:           | Friday, April 20, 2012 11:23:27 AM  |
| Injection date:            | Friday, April 20, 2012 02:11:25 PM  |
| GC Description:            | Gas Chromatograph - SN: @COM1:      |
| Signal description:        | OOS1 A, B                           |
| Method:                    | 75-1-7-270-2                        |
| Method last saved:         | Monday, October 04, 2010 7:34:50 PM |

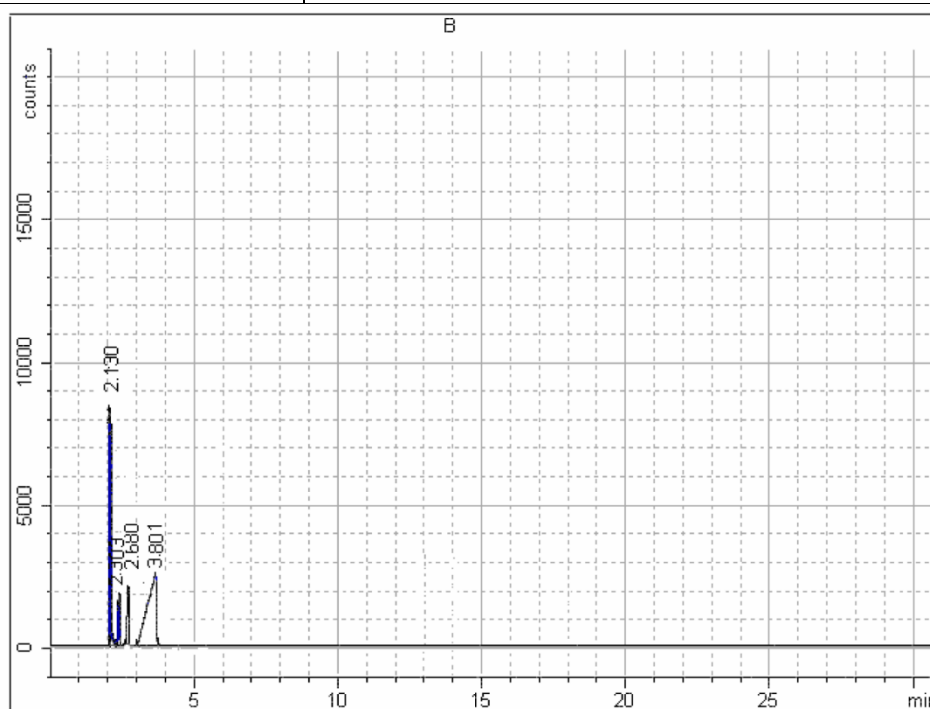

| Calibration last saved: |                      |      |             |                 |          |
|-------------------------|----------------------|------|-------------|-----------------|----------|
| Multiplier:             | 1.0000               |      |             |                 |          |
| Dilution:               | 1.0000               |      |             |                 |          |
| Sample amount:          | 0.0000 Microlitres   |      |             |                 |          |
| Sample type:            | Sample               |      |             |                 |          |
| Sampling source:        | Manual               |      |             |                 |          |
| Signal                  | Retention Time [min] | Type | Width [min] | Area [counts*s] | Area %   |
| 1                       | 2.130                | PV   | 0.038       | 6499.75420      | 45.37689 |
| 1                       | 2.303                | VB   | 0.034       | 1924.27250      | 13.4320  |
| 1                       | 2.680                | PB   | 0.045       | 2068.96231      | 14.44555 |
| 1                       | 3.801                | PV   | 0.204       | 3833.87761      | 26.76311 |
